# Supplementary material for: Detrimental impact of aqueous mobile phases on 18F-labelled radiopharmaceutical analysis via radio-TLC
Source: Royal Society of Chemistry journal article supplement (doi:10.1039/d2ay01206e), 2022-12-02
Supplement: d2ay01206e1.pdf [file d2ay01206e1.pdf]

Detrimental Impact of Aqueous Mobile Phases in  $^{18}\text{F}$ -labelled Radiopharmaceutical  
Analysis via Radio-TLC

Travis S. Laferriere-Holloway, Alejandra Rios, and R. Michael van Dam

**Supplementary Information**

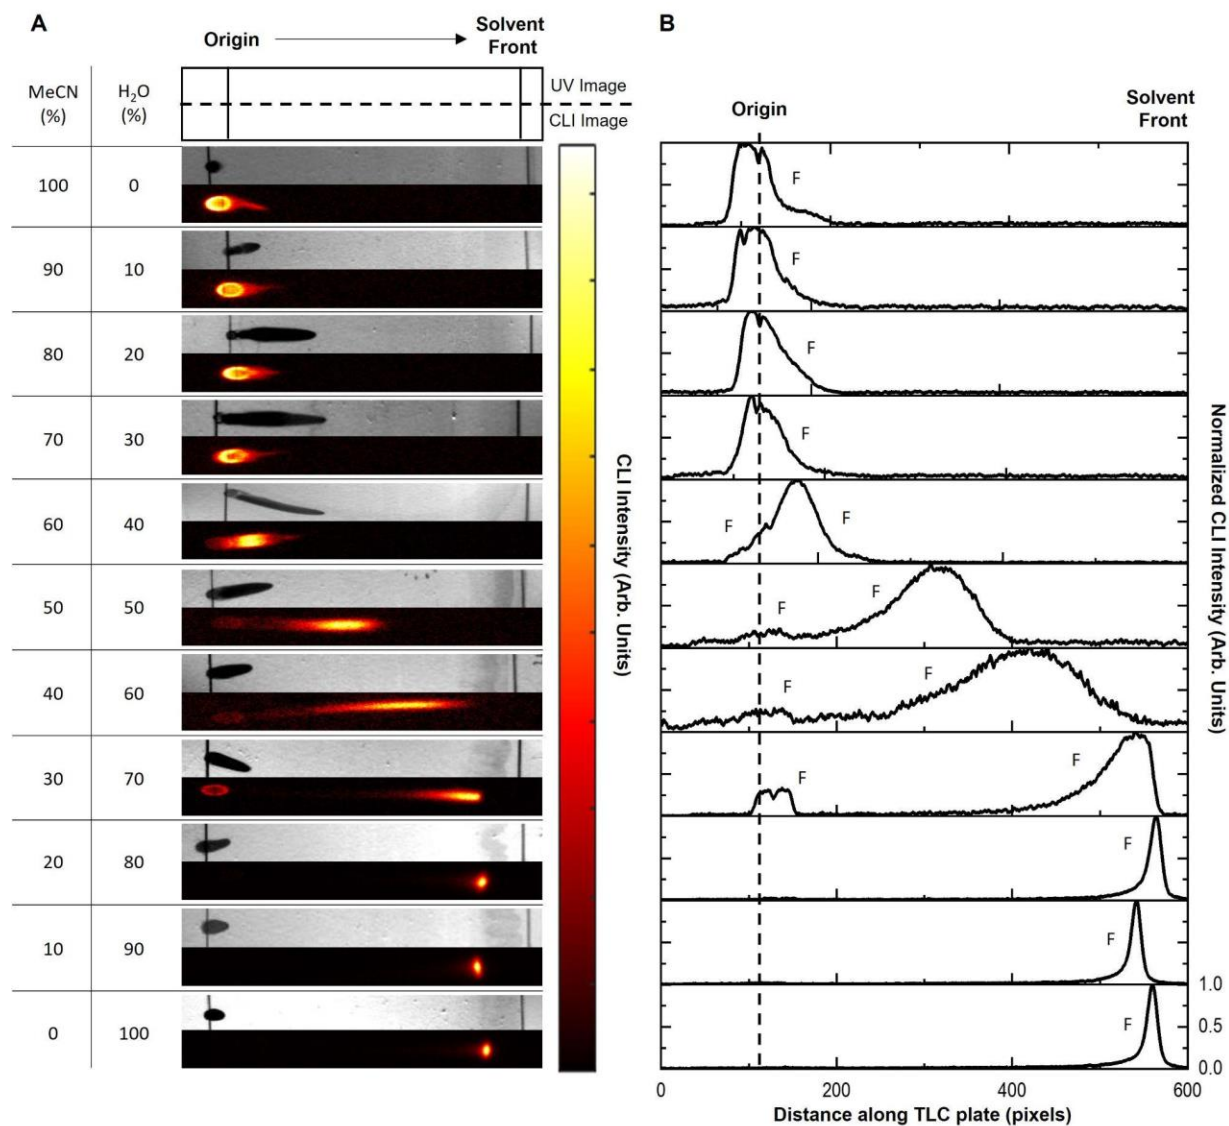

**Figure S1.** The effect of aqueous mobile phases (MeCN:H<sub>2</sub>O) on the migration of [<sup>18</sup>F]KF/K<sub>222</sub>. **(A)** For each mobile phase composition, two images are shown: a UV image of the TLC plate spotted with K<sub>2</sub>CO<sub>3</sub>/K<sub>222</sub> and stained with I<sub>2</sub> (top) and a CLI image of a TLC plate spotted with [<sup>18</sup>F]KF/K<sub>222</sub> (middle). **(B)** TLC chromatograms generated from the CLI images. F denotes [<sup>18</sup>F]KF/K<sub>222</sub>.

**Table S1.** Impact of water composition in aqueous mobile phases (MeCN:H<sub>2</sub>O) on the R<sub>f</sub> of [<sup>18</sup>F]KF/K<sub>222</sub>.

| MeCN (%) | H <sub>2</sub> O (%) | R <sub>f</sub> |
|----------|----------------------|----------------|
| 100      | 0                    | 0.0            |
| 90       | 10                   | 0.0            |
| 80       | 20                   | 0.0            |
| 70       | 30                   | 0.0            |
| 60       | 40                   | 0.0, 0.16      |
| 50       | 50                   | 0.0, 0.40      |
| 40       | 60                   | 0.0, 0.53      |
| 30       | 70                   | 0.0, 0.77      |
| 20       | 80                   | 0.88           |
| 10       | 90                   | 0.92           |
| 0        | 100                  | 0.93           |

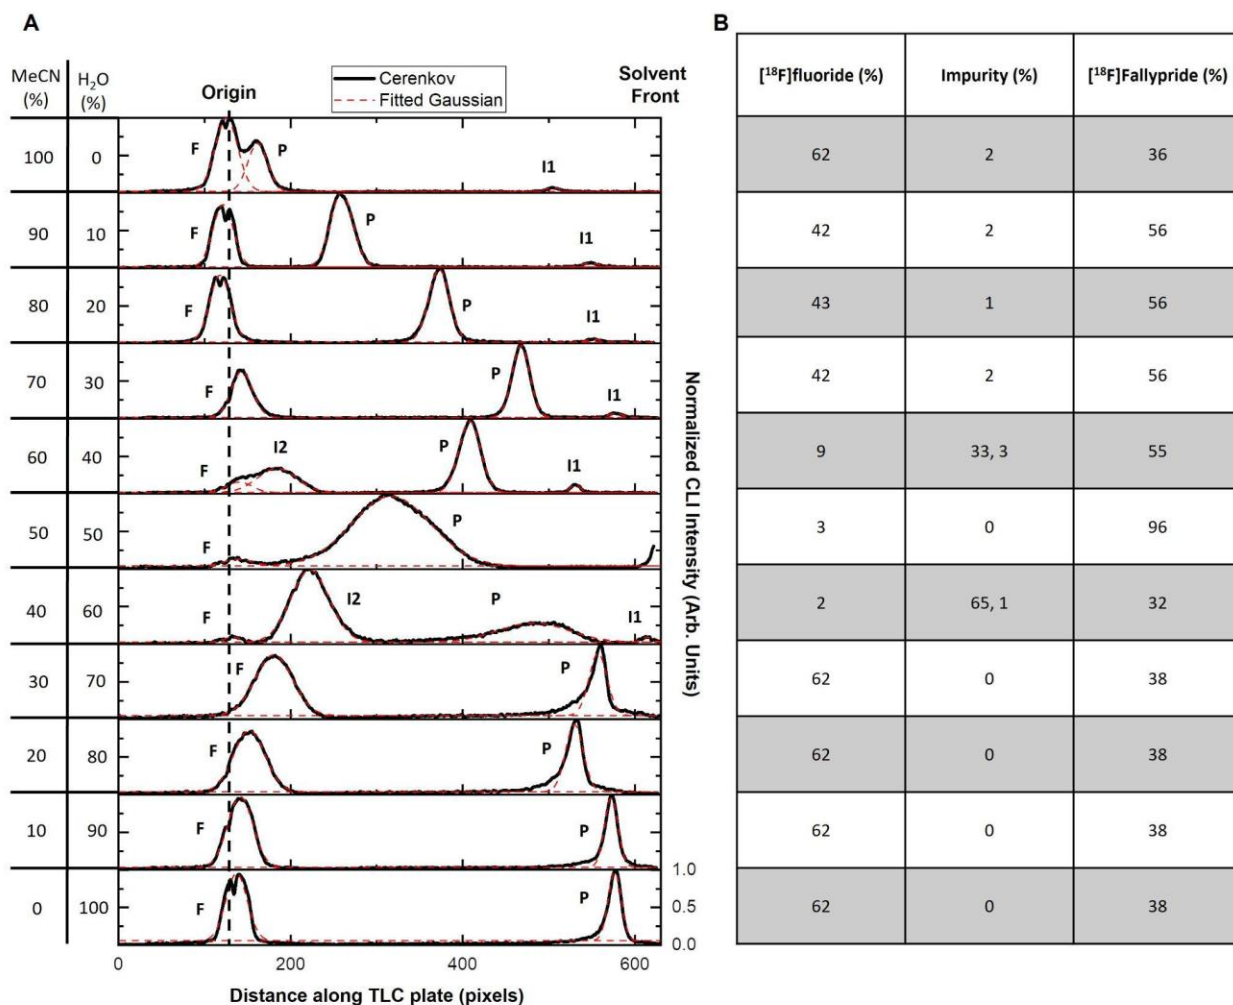

**Figure S2.** The adverse impact of water-containing mobile phases in the naive calculation of fluorination efficiency for [<sup>18</sup>F]Fallypride. **(A)** Chromatograms of samples of [<sup>18</sup>F]Fallypride/[<sup>18</sup>F]TBAF separated under different compositions of MeCN:H<sub>2</sub>O mobile phases replicated from Figure 3. Chromatograms are annotated with the following naive assignment of bands: F ([<sup>18</sup>F]fluoride, assumed at origin), P (radiopharmaceutical product, confirmed with the spotting of Fallypride standard); I<sub>i</sub> (additional band(s), naively assumed to be impurities). **(B)** The computed proportion of each species based on naive assumptions. The actual proportions of [<sup>18</sup>F]TBAF and [<sup>18</sup>F]Fallypride in the samples were 44% and 56%, respectively.

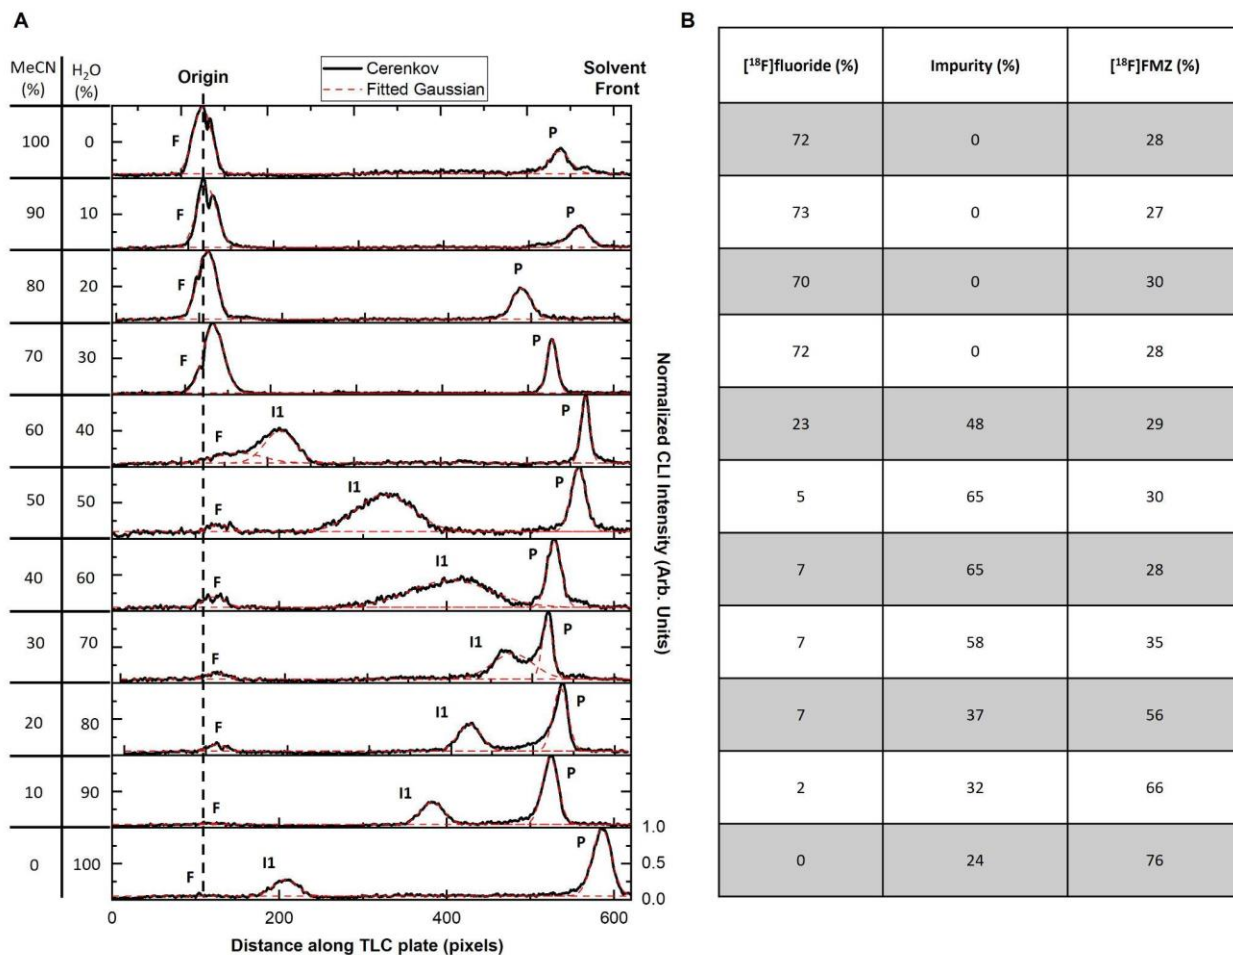

**Figure S3.** The adverse impact of water-containing mobile phases in the naive calculation of fluorination efficiency for [<sup>18</sup>F]FMZ. **(A)** Chromatograms of samples of [<sup>18</sup>F]FMZ/[<sup>18</sup>F]TBAF separated under different compositions of MeCN:H<sub>2</sub>O mobile phases replicated from Figure 4. Chromatograms are annotated with the naive assignment of bands: F ([<sup>18</sup>F]fluoride, assumed at origin), P (radiopharmaceutical product, confirmed with the spotting of FMZ standard); I<sub>i</sub> (additional band(s), naively assumed to be impurities). **(B)** The computed proportion of species is based on naive assumptions. The samples' actual proportions of [<sup>18</sup>F]TBAF and [<sup>18</sup>F]Fallypride were 72% and 28%, respectively.

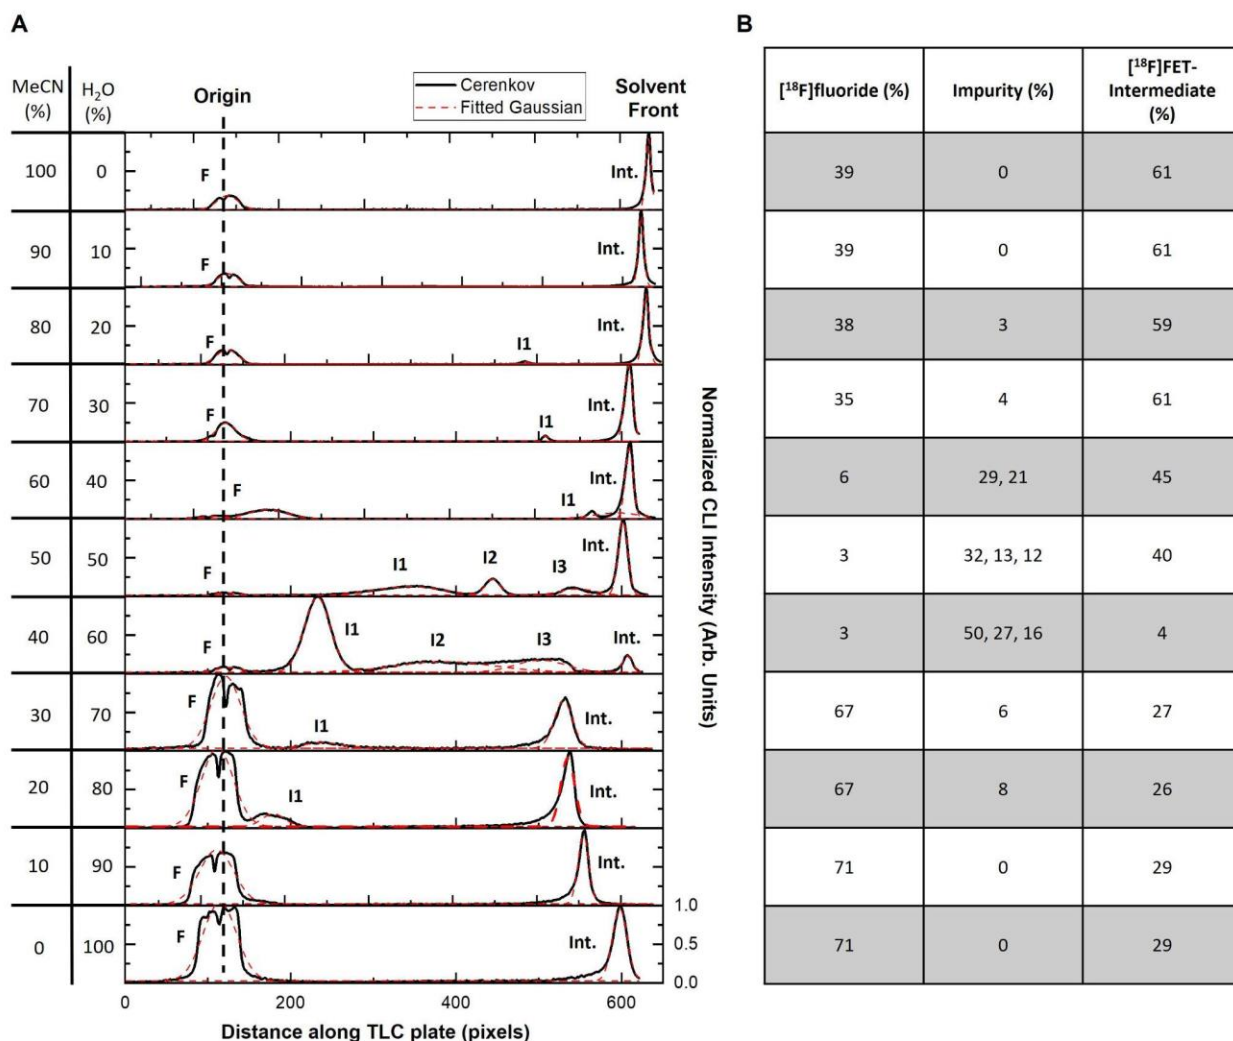

**Figure S4.** The adverse impact of water-containing mobile phases in the naive calculation of fluorination efficiency for [<sup>18</sup>F]FET-intermediate. **(A)** Chromatograms of samples of [<sup>18</sup>F]FET-intermediate/[<sup>18</sup>F]TBAF separated under different compositions of MeCN:H<sub>2</sub>O mobile phases replicated from Figure 5. Chromatograms are annotated with the naive assignment of bands: F ([<sup>18</sup>F]fluoride, assumed at origin), P (radiopharmaceutical product, assumed at the solvent front); I<sub>i</sub> (additional band(s), naively assumed to be impurities). **(B)** The computed proportion of species is based on naive assumptions. The actual proportions of [<sup>18</sup>F]TBAF and [<sup>18</sup>F]FET-intermediate in the samples were 39% and 61%, respectively.
